# Supplementary material
Source: PubMed Central journal article supplement (PMC6217976)
Supplement: NIHMS1507914-supplement-1.pdf [file NIHMS1507914-supplement-1.pdf]

A

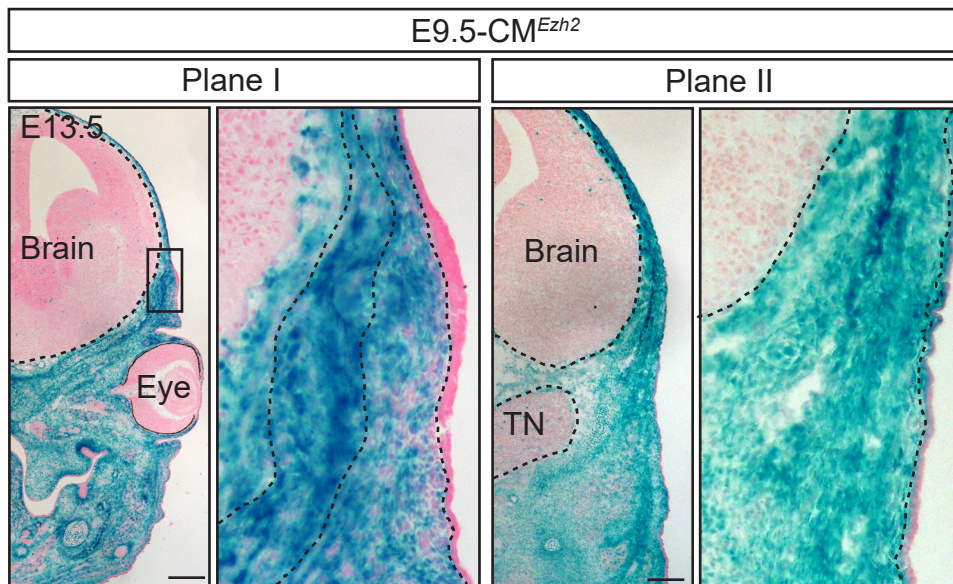

B

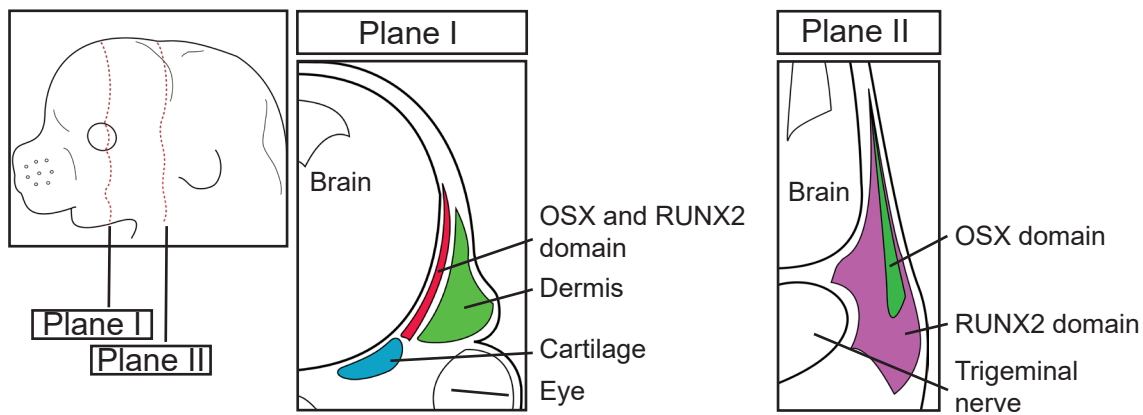

C

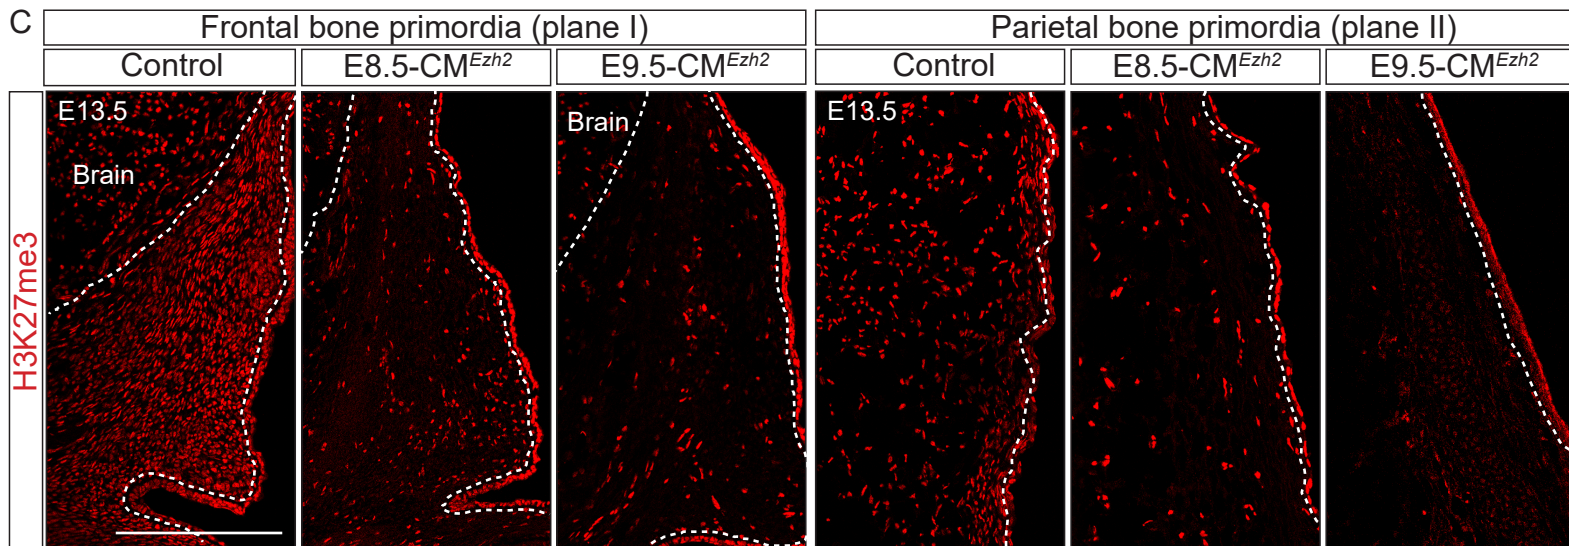

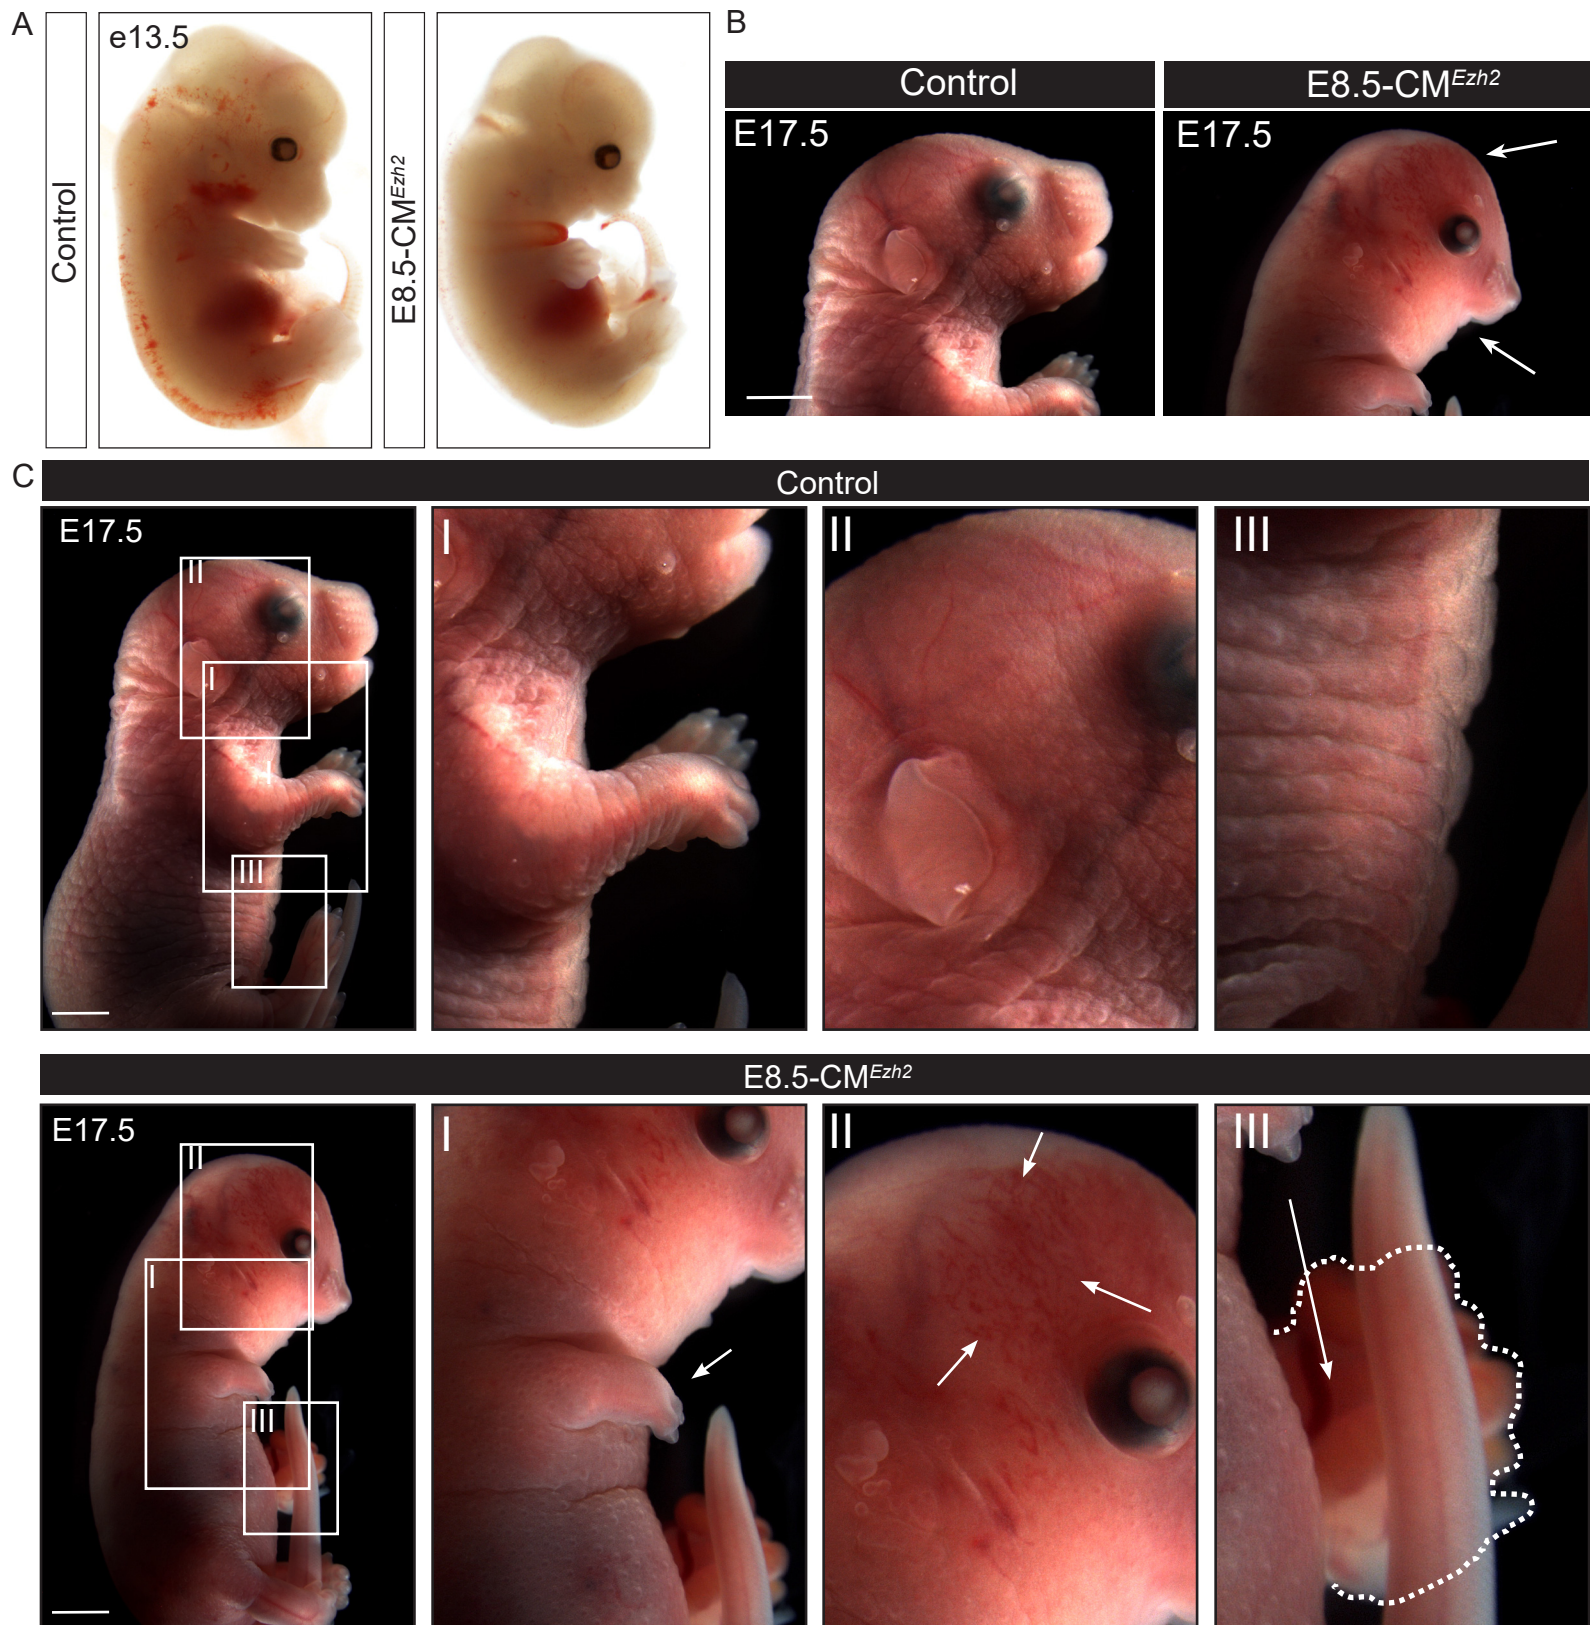



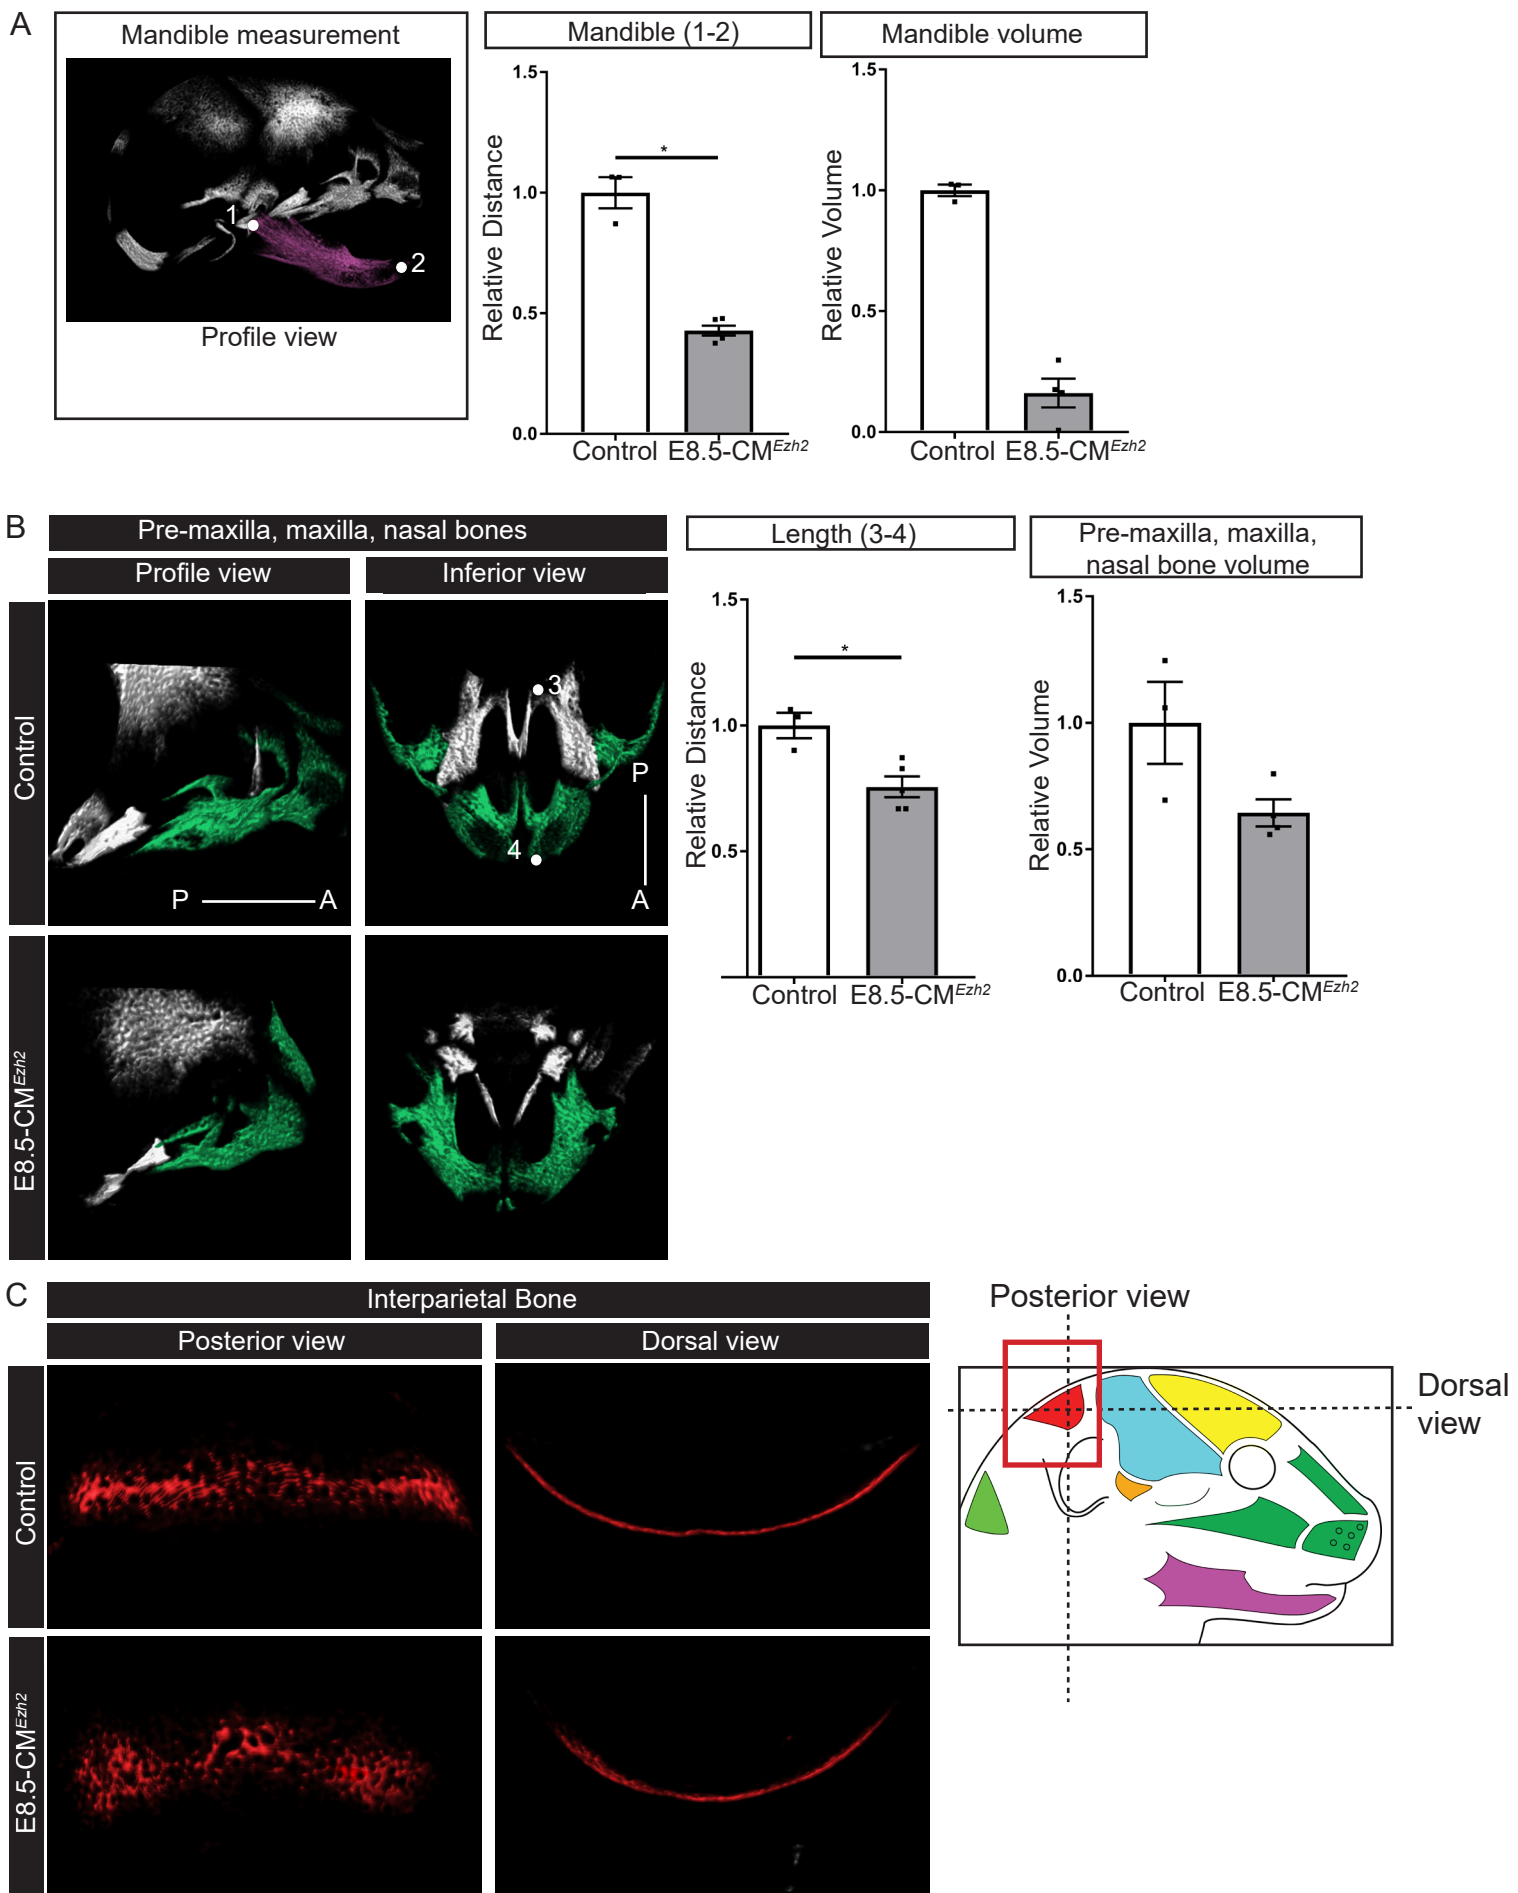

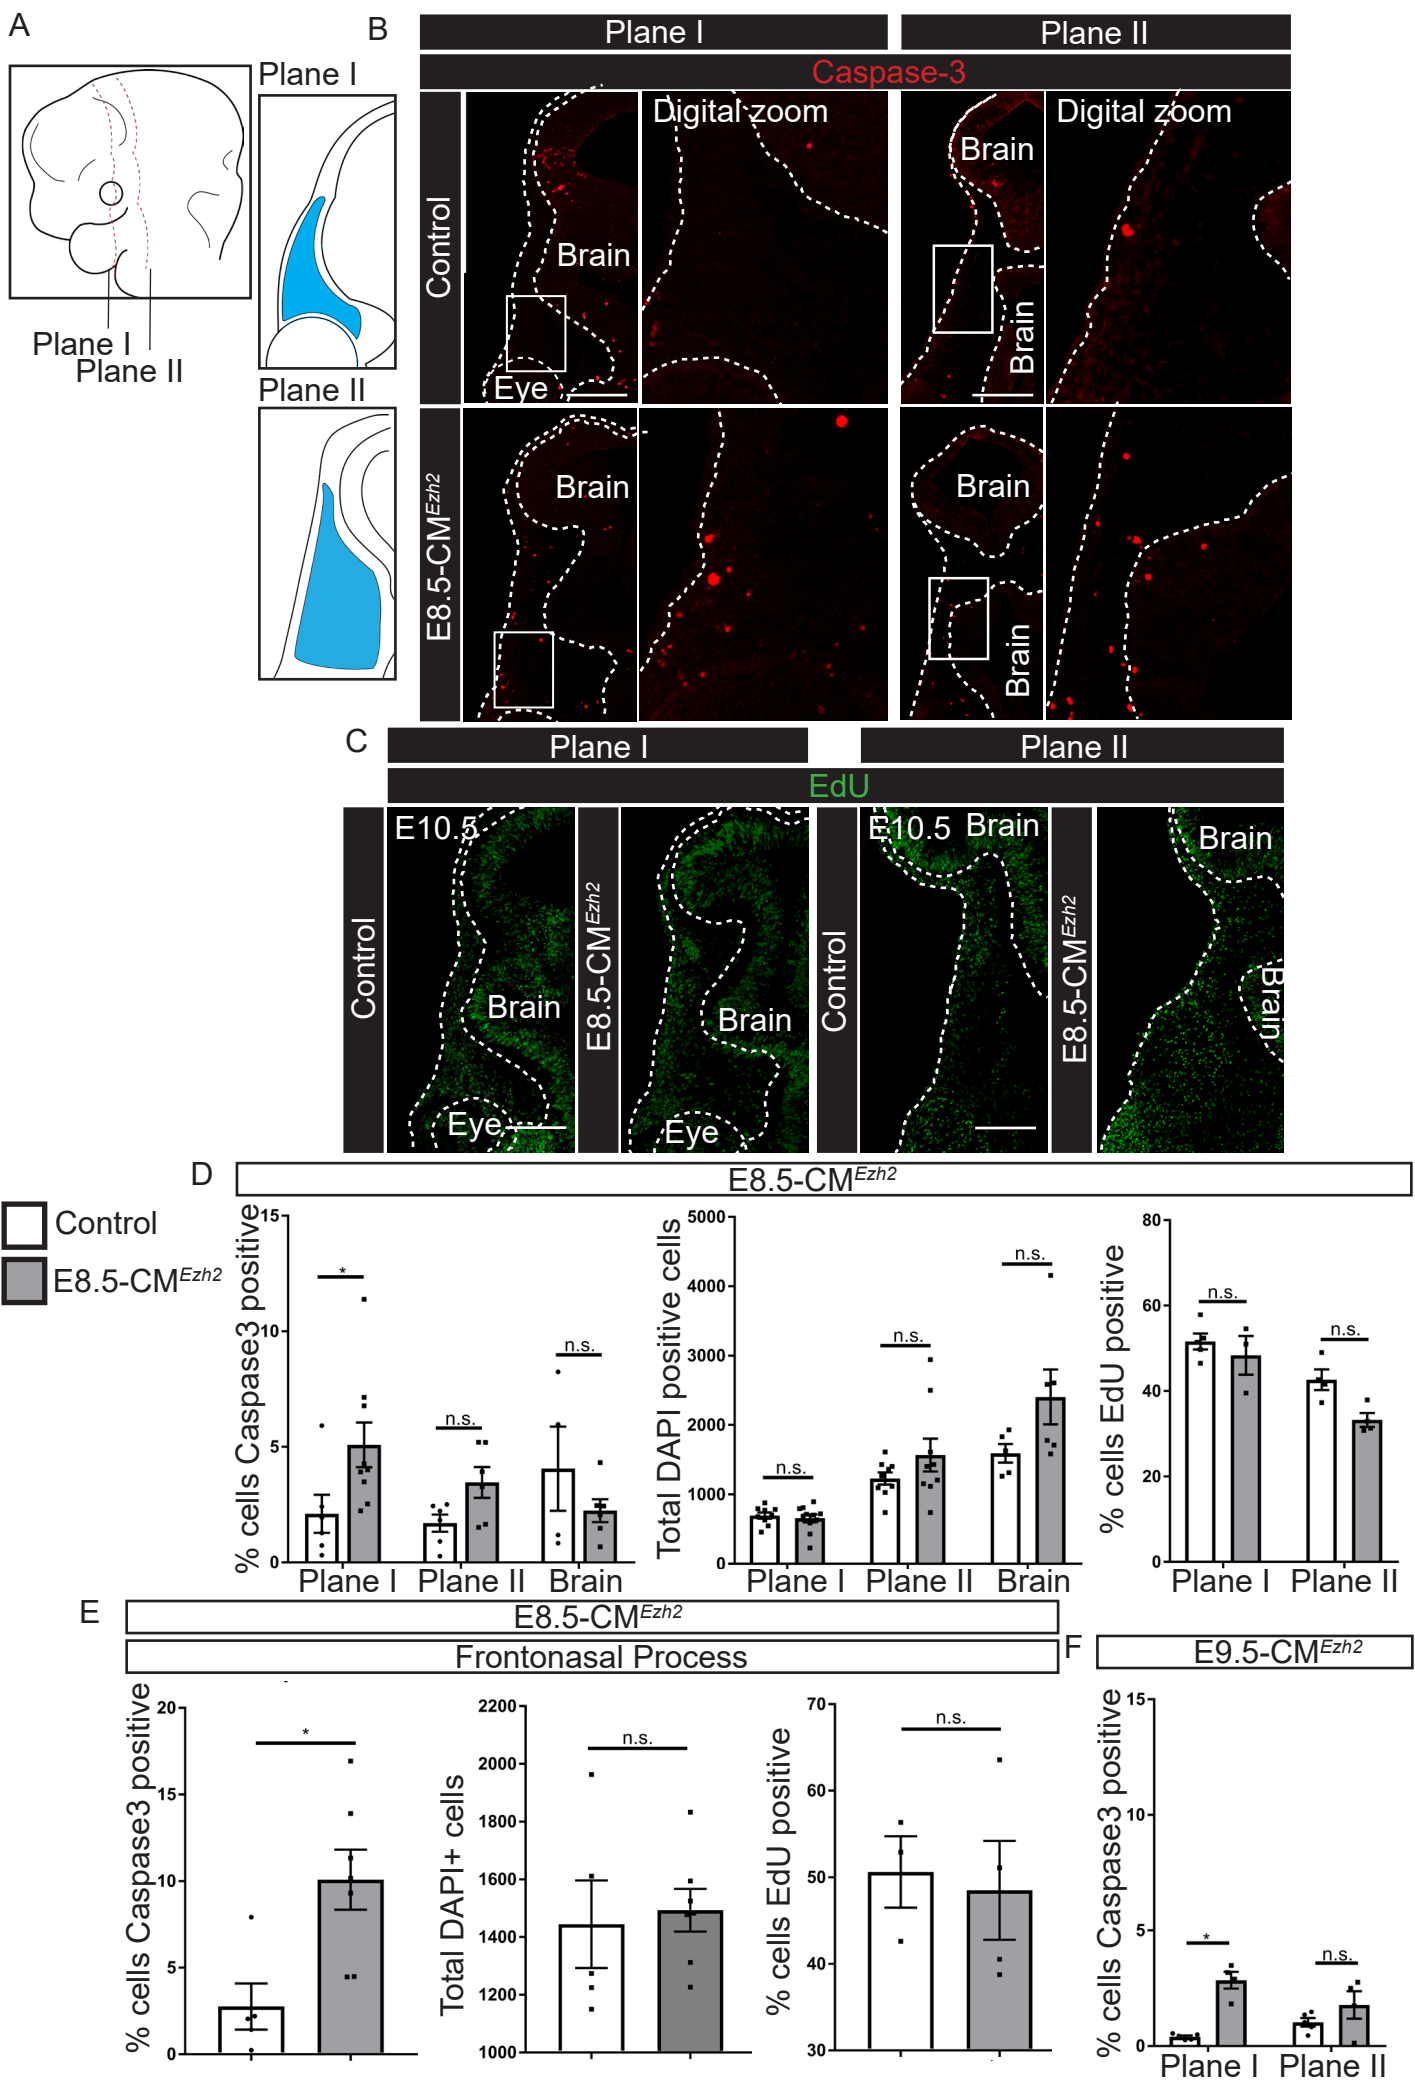

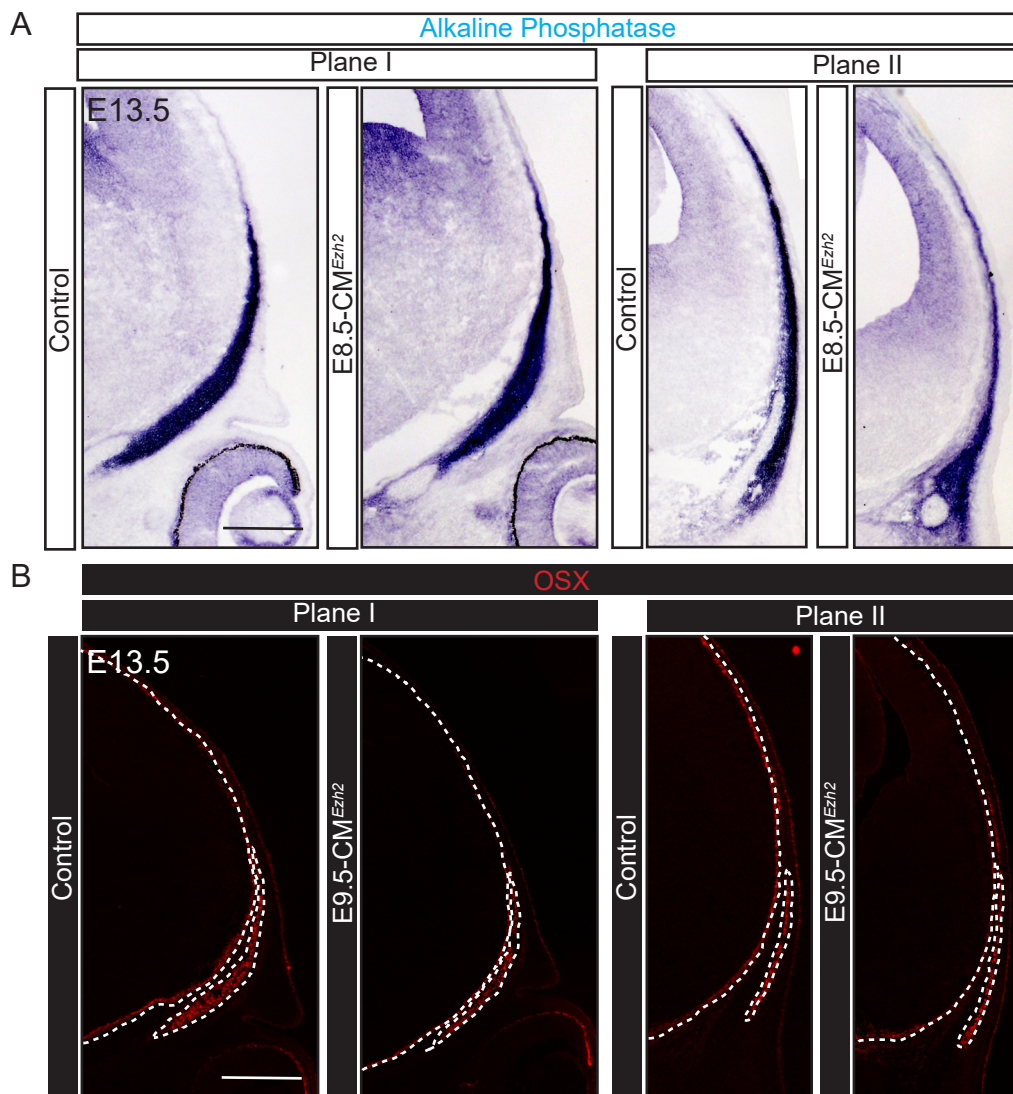

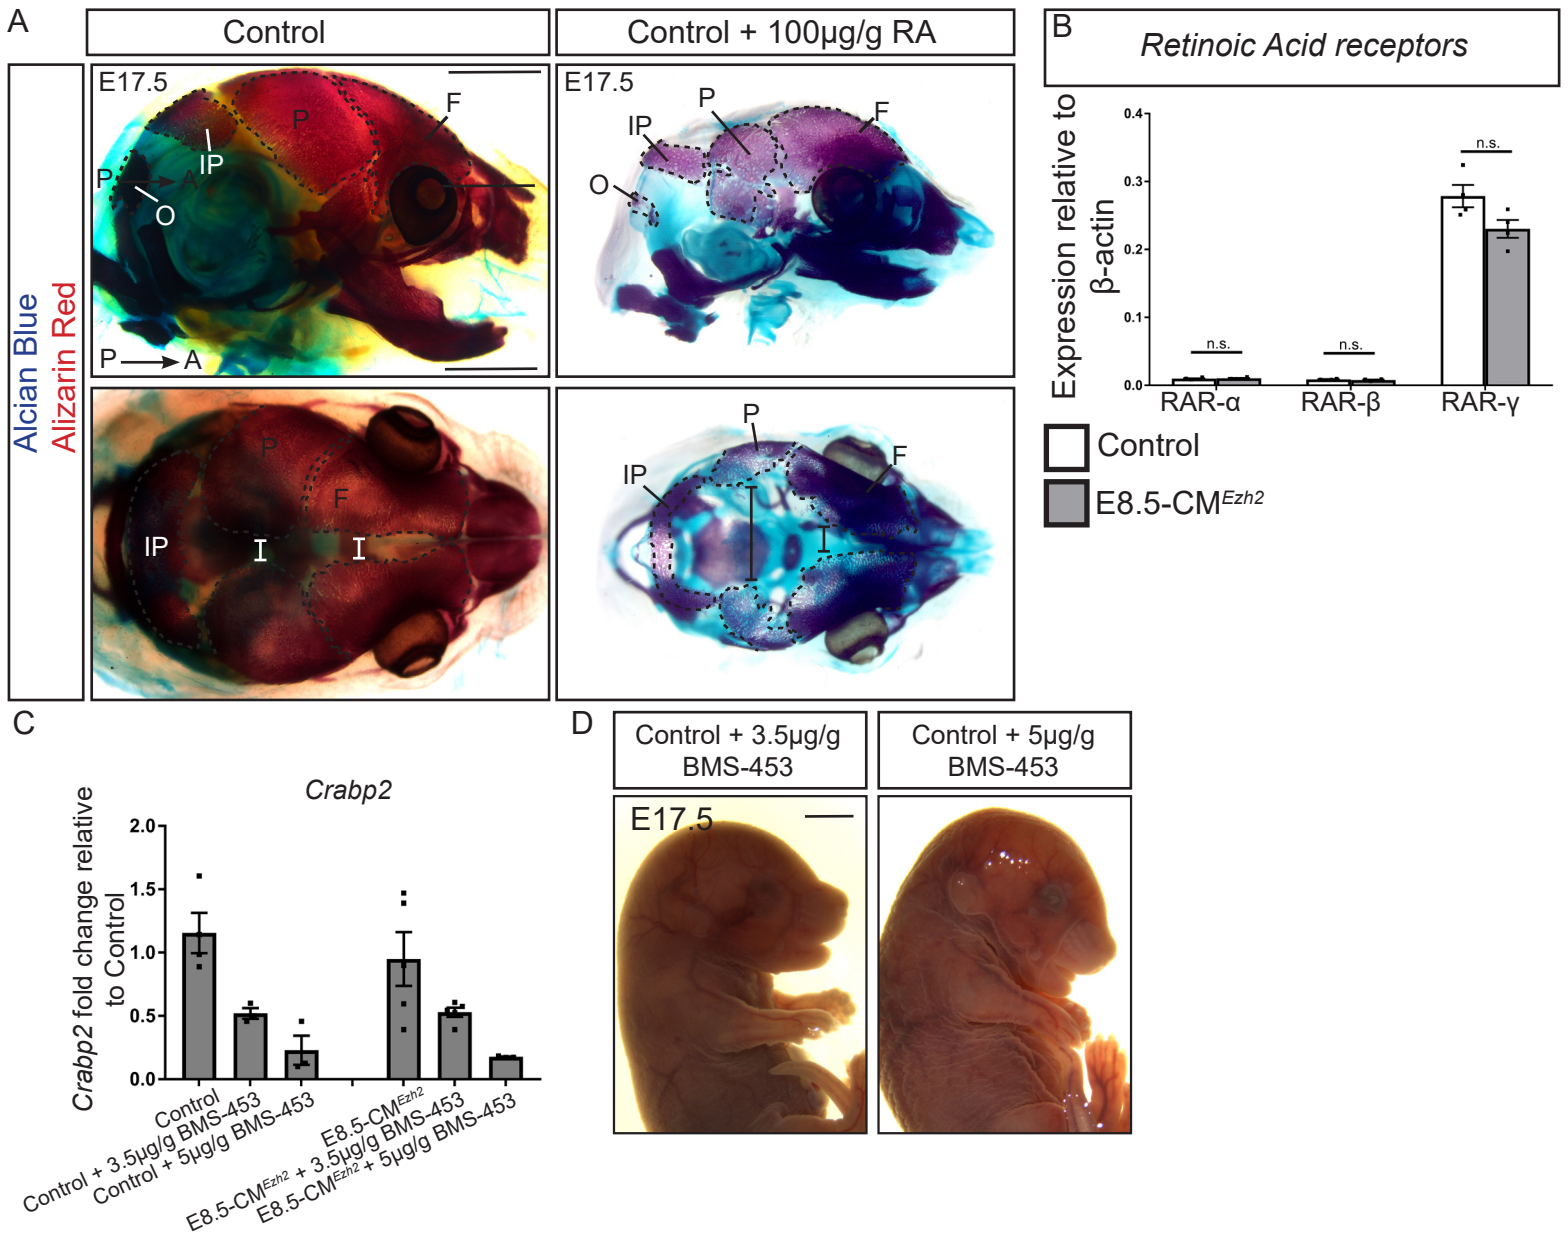

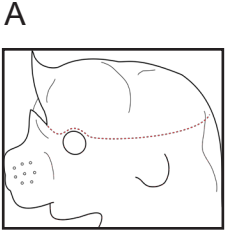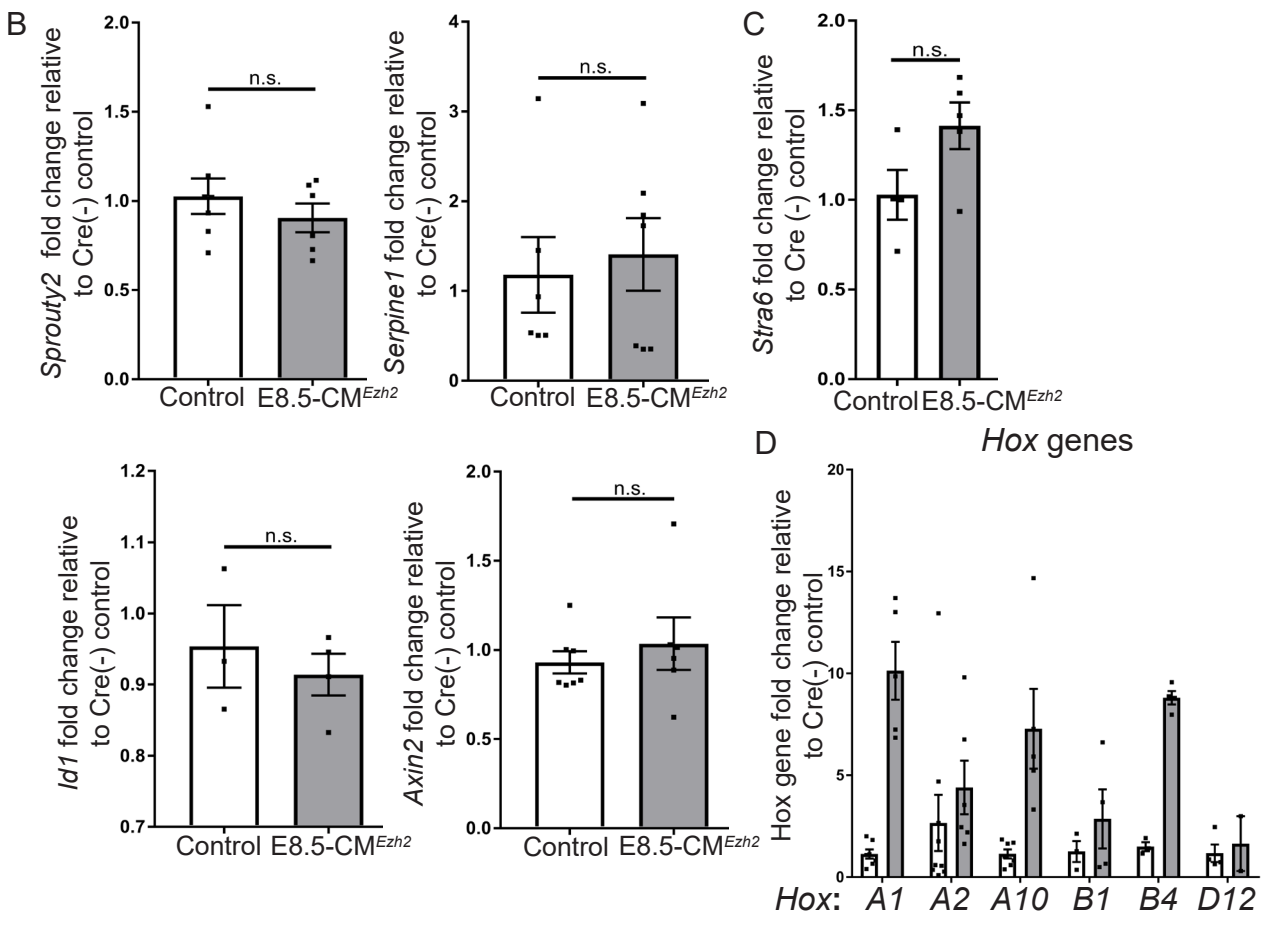

| Function                | Gene name          | Relative expression (in E8.5-CM <i>Ezh2</i> ) | probe ID      |
|-------------------------|--------------------|-----------------------------------------------|---------------|
| BMP signaling           | <i>Bmp4</i>        | 0.6074                                        | Mm00432087_m1 |
|                         | <i>RankL</i>       | 0.5310                                        | Mm00441906_m1 |
|                         | <i>Osteopontin</i> | 0.4459                                        | Mm00436767_m1 |
|                         | <i>Id1</i>         | -0.0397                                       | Mm00775963_g1 |
| Bone initiation program | <i>Msx1</i>        | 0.0393                                        | Mm00440330_m1 |
|                         | <i>Sp7 (Osx)</i>   | 4.2847                                        | Mm04209856_m1 |
|                         | <i>Runx2</i>       | -0.2593                                       | Mm00501584_m1 |
| Cell cycle              | <i>Ccnd1</i>       | 0.7192                                        | Mm00432359_m1 |
|                         | <i>Ccne1</i>       | 0.1078                                        | Mm01266311_m1 |
|                         | <i>Cdkn1a</i>      | 0.3668                                        | Mm00432448_m1 |
|                         | <i>Cdkn2a</i>      | 638.3289                                      | Mm00494449_m1 |
|                         | <i>Ccnd2</i>       | 0.6234                                        | Mm00438070_m1 |
|                         | <i>Nfkb1</i>       | 0.1162                                        | Mm01316100_m1 |
| Cell proliferation      | <i>Pdgfra</i>      | 0.1354                                        | Mm00440701_m1 |
| Chondrogenesis          | <i>Sox9</i>        | -0.6689                                       | Mm00448840_m1 |
| FGF signaling           | <i>Gata4</i>       | -0.9832                                       | Mm00484689_m1 |
|                         | <i>Sprouty1</i>    | -0.1827                                       | Mm01285700_m1 |
|                         | <i>Sprouty2</i>    | -0.1210                                       | Mm00442344_m1 |
| Hedgehog signaling      | <i>Ihh</i>         | 0.9436                                        | Mm00439613_m1 |
|                         | <i>Pthrp</i>       | 1.4601                                        | Mm00436057_m1 |
|                         | <i>Gli1</i>        | 0.2224                                        | Mm00494654_m1 |
|                         | <i>Snai1</i>       | -0.3756                                       | Mm00441533_g1 |
|                         | <i>Hand2</i>       | 162.0406                                      | Mm00439247_m1 |
| Hox gene                | <i>HoxA1</i>       | 10.0000                                       | Mm00439359_m1 |
|                         | <i>HoxA2</i>       | 1.7383                                        | Mm00439361_m1 |
|                         | <i>HoxA10</i>      | 11.8114                                       | Mm00433966_m1 |
|                         | <i>HoxB1</i>       | 1.6035                                        | Mm00515118_g1 |
|                         | <i>HoxB4</i>       | 4.9731                                        | Mm00657964_m1 |
|                         | <i>HoxC8</i>       | 190.0000                                      | Mm00439369_m1 |
|                         | <i>HoxD12</i>      | 0.4712                                        | Mm01962622_s1 |
| HoxC8 target            | <i>Emb</i>         | 0.7458                                        | Mm00515881_m1 |
| PRC2 component          | <i>Eed</i>         | -0.1474                                       | Mm00469660_m1 |
|                         | <i>Ezh1</i>        | -0.4302                                       | Mm01292494_g1 |
|                         | <i>Ezh2</i>        | -0.8898                                       | Mm00468460_m1 |
|                         | <i>Suz12</i>       | 0.0631                                        | Mm01304152_m1 |
| RA signaling            | <i>Crabp2</i>      | -0.1045                                       | Mm00801693_g1 |
|                         | <i>Raldh2</i>      | 0.1947                                        | Mm00501306_m1 |
|                         | <i>RARα</i>        | 0.0171                                        | Mm01296312_m1 |
|                         | <i>RARβ</i>        | -0.1353                                       | Mm01319677_m1 |
|                         | <i>RARγ</i>        | -0.1983                                       | Mm00441091_m1 |
|                         | <i>Stra6</i>       | 0.3860                                        | Mm00486457_m1 |
|                         | <i>Cyp26b1</i>     | 0.2203                                        | Mm00558507_m1 |
| TGFβ signaling          | <i>Smad3</i>       | -0.1666                                       | Mm01170760_m1 |
|                         | <i>Serpine1</i>    | -0.2272                                       | Mm00435858_m1 |
| Wnt signaling           | <i>Axin2</i>       | -0.0293                                       | Mm00443610_m1 |
|                         | <i>Wnt5a</i>       | -0.8531                                       | Mm00437347_m1 |
|                         | <i>Twist1</i>      | -0.0075                                       | Mm00442036_m1 |
|                         | <i>Twist2</i>      | 0.8524                                        | Mm00492147_m1 |

Downregulated

Upregulated
